# Supplementary figures and images for: Lycopene from tomatoes and tomato products exerts renoprotective effects by ameliorating oxidative stress, apoptosis, pyroptosis, fibrosis, and inflammatory injury in calcium oxalate nephrolithiasis: the underlying mechanisms
Source: Royal Society of Chemistry journal article supplement (doi:10.1039/d4fo00042k), 2024-01-01

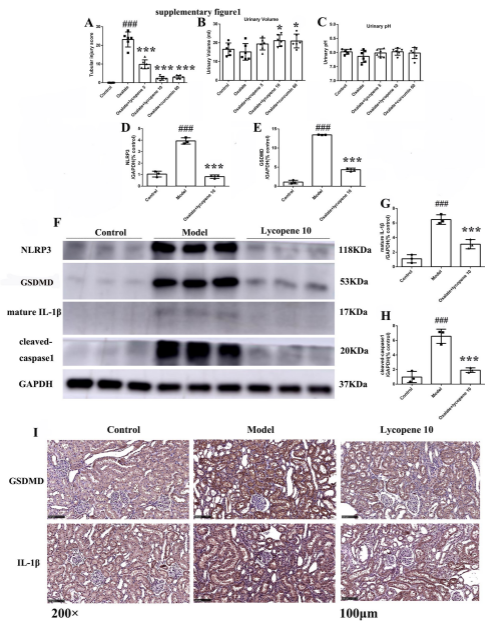

Supplement: d4fo00042k1.pdf [file d4fo00042k1.pdf]

## Supplementary Figure 2

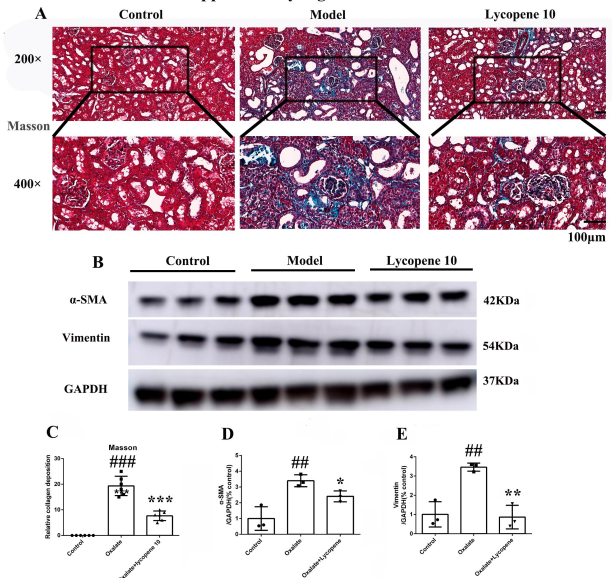

Supplement: d4fo00042k2.pdf [file d4fo00042k2.pdf]

Supplementary Figure 3

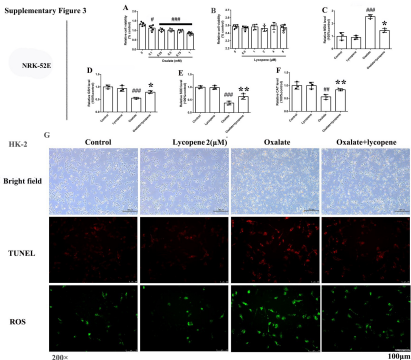

Supplement: d4fo00042k3.pdf [file d4fo00042k3.pdf]

Supplementary Figure 4

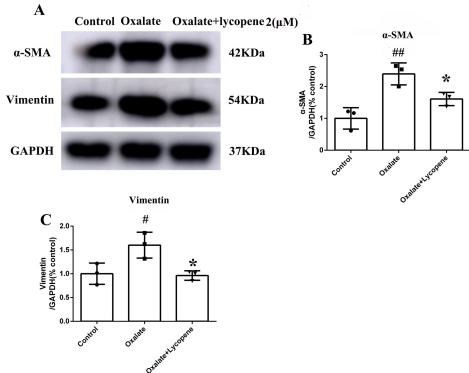

Supplement: d4fo00042k4.pdf [file d4fo00042k4.pdf]

Supplementary Figure 5

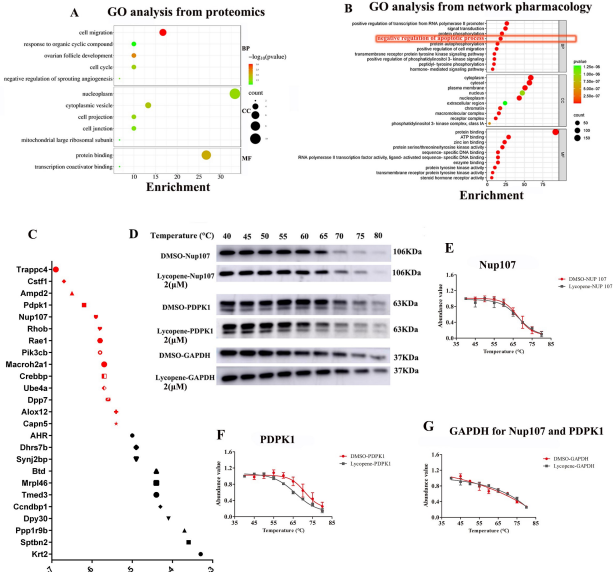

Supplement: d4fo00042k5.pdf [file d4fo00042k5.pdf]

Supplementary Figure 6

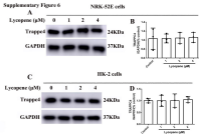

Supplement: d4fo00042k6.pdf [file d4fo00042k6.pdf]
